# Supplementary material for: Rotating night work, lifestyle factors, obesity and promoter methylation in BRCA1 and BRCA2 genes among nurses and midwives
Source: PubMed Central journal article supplement (PMC5464581; doi:10.1371/journal.pone.0178792), 2017-06-08
Supplement: pone.0178792.s001.pdf [file pone.0178792.s001.pdf]

S1 Table. Selected characteristics of the studied population of nurses and midwives in the cross-sectional study by current rotating night work status

| Characteristic                                                              | Current rotating night workers<br>N=347 | Current day workers<br>N=363 | P <sup>d</sup>      |
|-----------------------------------------------------------------------------|-----------------------------------------|------------------------------|---------------------|
| Age (years), AM (SD)                                                        | 48.3(5.2)                               | 50.2(5.3)                    | <0.001 <sup>c</sup> |
| Duration of the night work in years , n (%)                                 |                                         |                              |                     |
| ≤10                                                                         | 10(2.9)                                 | 179(49.3)                    | <0.001              |
| >10-≤20                                                                     | 58(16.7)                                | 117(32.2)                    |                     |
| >20                                                                         | 279(80.4)                               | 67(18.5)                     |                     |
| Smoking, n (%)                                                              |                                         |                              |                     |
| never                                                                       | 146(42.1)                               | 156(43.0)                    | 0.07                |
| past                                                                        | 81(23.3)                                | 110(30.3)                    |                     |
| current                                                                     | 120(34.6)                               | 97(26.7)                     |                     |
| Amount of cigarettes smoked per day among current smokers, n (%)            |                                         |                              |                     |
| 1-4                                                                         | 0                                       | 0                            | 0.27                |
| 5-14                                                                        | 16(13.3)                                | 14(14.4)                     |                     |
| 15-24                                                                       | 49(40.8)                                | 49(50.5)                     |                     |
| >24                                                                         | 55(45.8)                                | 34(35.1)                     |                     |
| Smoking duration among ever smokers in years, n <sup>b</sup> (%)            |                                         |                              |                     |
| ≤10                                                                         | 16(7.9)                                 | 32(15.5)                     | 0.004               |
| >10-≤20                                                                     | 19(9.5)                                 | 23(11.1)                     |                     |
| >20                                                                         | 166(82.6)                               | 151(73.0)                    |                     |
| Packyears, AM (SD)                                                          | 9.9(11.3)                               | 8.5(10.5)                    | 0.007               |
| Alcohol drinking(no of drinks/week), AM (SD)                                | 06(0.7)                                 | 0.6(0.7)                     | 0.56                |
| Lifelong duration of alcohol drinking (years), AM (SD)                      | 29.2(8.0)                               | 30.5(8.1)                    | 0.94                |
| Drinkyears, AM(SD)                                                          | 11.2(15.1)                              | 11.3(14.8)                   | 0.83                |
| Current alcohol abstinence, n(%)                                            |                                         |                              |                     |
| Yes                                                                         | 19(5.5)                                 | 16(4.4)                      | 0.50                |
| No                                                                          | 328(94.5)                               | 347(95.6)                    |                     |
| BMI(kg/m <sup>2</sup> ) , n(%)                                              |                                         |                              |                     |
| <25                                                                         | 124(35.7)                               | 138(38.0)                    | 0.70                |
| ≥25 - <30                                                                   | 137(39.5)                               | 144(39.7)                    |                     |
| ≥30                                                                         | 86(24.8)                                | 81(22.3)                     |                     |
| WHR <sup>b</sup> , n (%)                                                    |                                         |                              |                     |
| ≤0.85                                                                       | 255(73.5)                               | 274(75.5)                    | 0.11                |
| >0.85                                                                       | 91(26.2)                                | 89(24.5)                     |                     |
| Total physical activity (MET*hrs/wk), AM (SD)                               | 241(78)                                 | 202(88)                      | <0.001              |
| Recreational PA <sup>b</sup> , n(%)                                         |                                         |                              |                     |
| None                                                                        | 111(32.0)                               | 87(24.0)                     | 0.02                |
| Any                                                                         | 235(67.7)                               | 275(75.8)                    |                     |
| Total folate intake per day in µg AM (SD)                                   | 381.3(136.6)                            | 382.7(140.5)                 | 0.37                |
| Methylation index of the promoter of <i>BRCA1</i> gene, n (%)               |                                         |                              |                     |
| unmethylated                                                                | 269(77.5)                               | 288(79.3)                    | 0.73                |
| methylated                                                                  | 78(22.5)                                | 75(20.7)                     |                     |
| Methylation index of the promoter of <i>BRCA2</i> gene <sup>b</sup> , n (%) |                                         |                              |                     |

|              |           |           |      |
|--------------|-----------|-----------|------|
| unmethylated | 281(81.0) | 298(82.1) | 0.93 |
| methylated   | 66(19.0)  | 64(17.6)  |      |

<sup>a</sup> - abbreviations: BMI - Body Mass Index; WHR – Waist to Hip Ratio; MET - Metabolic Equivalent

<sup>b</sup> – missing data for WHR ,and WHtR for one day worker; for smoking duration in 1 woman day worker; for recreational activity for 1 day and 1 rotating night worker, for global methylation for 4 day and 3 rotating night workers, , for methylation index in BRCA2 for 1 day worker

<sup>c</sup> – p determined with t test

<sup>d</sup> – p determined with regression analysis age adjusted
